# Supplementary material
Source: publisher figshare collection journal article supplement (https://acs.figshare.com/ndownloader/files/4025647)

# Total Synthesis of the Cytotoxic Anhydrophytosphingosine Pachastrissamine (Jaspine B)

Vijay Dhand, Stanley Chang, and Robert Britton\*

*Department of Chemistry, Simon Fraser University, Burnaby, British Columbia, Canada, V5A 1S6.*

*rbritton@sfu.ca*

|                                                          |     |
|----------------------------------------------------------|-----|
| General Considerations.....                              | S2  |
| <sup>1</sup> H and <sup>13</sup> C spectra for           |     |
| (±)-Hydantoin <b>23</b> .....                            | S3  |
| (±)-γ-Lactone <b>27</b> .....                            | S4  |
| (+)-(R)-2-Chlorohept-6-enal ( <b>30</b> ).....           | S5  |
| Hydantoin <b>32</b> .....                                | S6  |
| γ-Lactone <b>33</b> .....                                | S7  |
| γ-Lactone <b>35</b> .....                                | S8  |
| Lactol <b>36</b> .....                                   | S9  |
| Carbamate <b>37</b> .....                                | S10 |
| (+)-Pachastrissamine <b>1</b> .....                      | S11 |
| (±)-γ-Lactone <b>38</b> .....                            | S12 |
| (±)-Dodecyl analogue of pachastrissamine <b>39</b> ..... | S13 |

## **General Considerations**

All reactions described were performed under an atmosphere of dry nitrogen using oven dried glassware unless otherwise specified. Flash chromatography was carried out with 230-400 mesh silica gel following the technique described by Still.<sup>1</sup> Concentration and removal of trace solvents was done via a rotary evaporator using dry ice/acetone condenser and vacuum from water or air aspirator.

All solvents, reagents, and starting materials were purchased from commercially available sources and were used without further purification unless otherwise specified. Diisopropylamine and dichloromethane was freshly distilled over calcium hydride. Tetrahydrofuran was freshly distilled over Na metal.

Nuclear magnetic resonance (NMR) spectra were recorded using deuteriochloroform (CDCl<sub>3</sub>). Signal positions ( $\delta$ ) are given in parts per million from tetramethylsilane ( $\delta$  0) and were measured relative to the signal of the solvent (CDCl<sub>3</sub>:  $\delta$  7.26, <sup>1</sup>H NMR;  $\delta$  77.0, <sup>13</sup>C NMR). Coupling constants (*J* values) are given in Hertz (Hz) and are reported to the nearest 0.1 Hz. <sup>1</sup>H NMR spectral data are tabulated in the order: multiplicity (s, singlet; d, doublet; t, triplet; m, multiplet), number of protons, coupling constants. NMR spectra were recorded on a 400 MHz, 500 MHz, or 600 MHz (equipped with a QNP or TCI cryoprobe) spectrometer. Assignments of <sup>1</sup>H and <sup>13</sup>C NMR spectra are based on analysis of <sup>1</sup>H-<sup>1</sup>H COSY, HSQC, HMBC, TOCSY and 1D NOESY spectra.

Infrared (IR) spectra were recorded on Fourier transform spectrophotometer. Only selected, characteristic absorption data are provided for each compound.

High resolution mass spectra were performed on a TOF LC/MS mass spectrometer (Ionization method: ESI).

Optical rotation was measured at 589 nm.

---

<sup>1</sup> Still, W. C.; Kahn, M.; Mitra, A. *J. Org. Chem.* **1978**, *43*, 2923-2925.

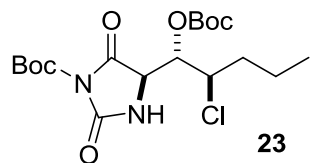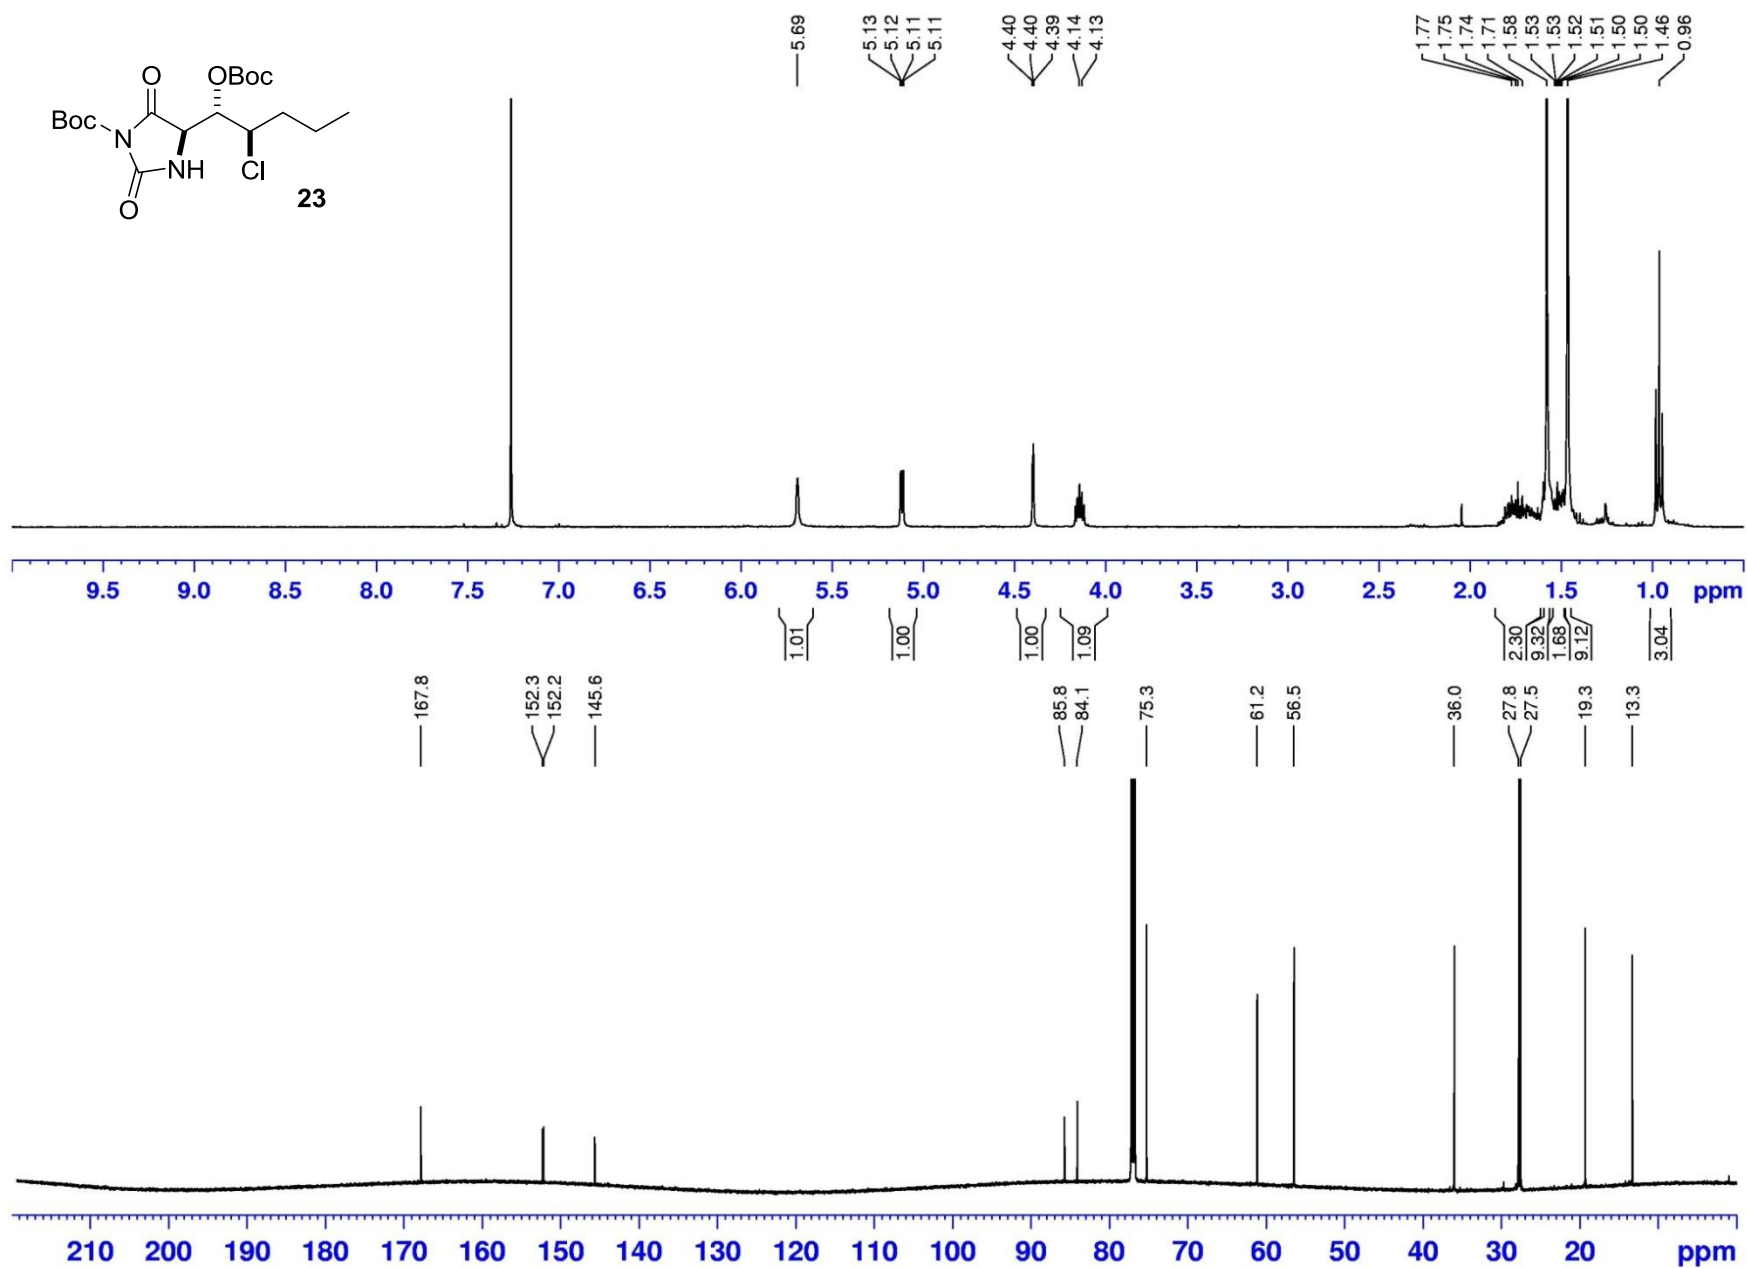

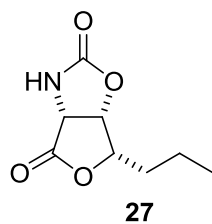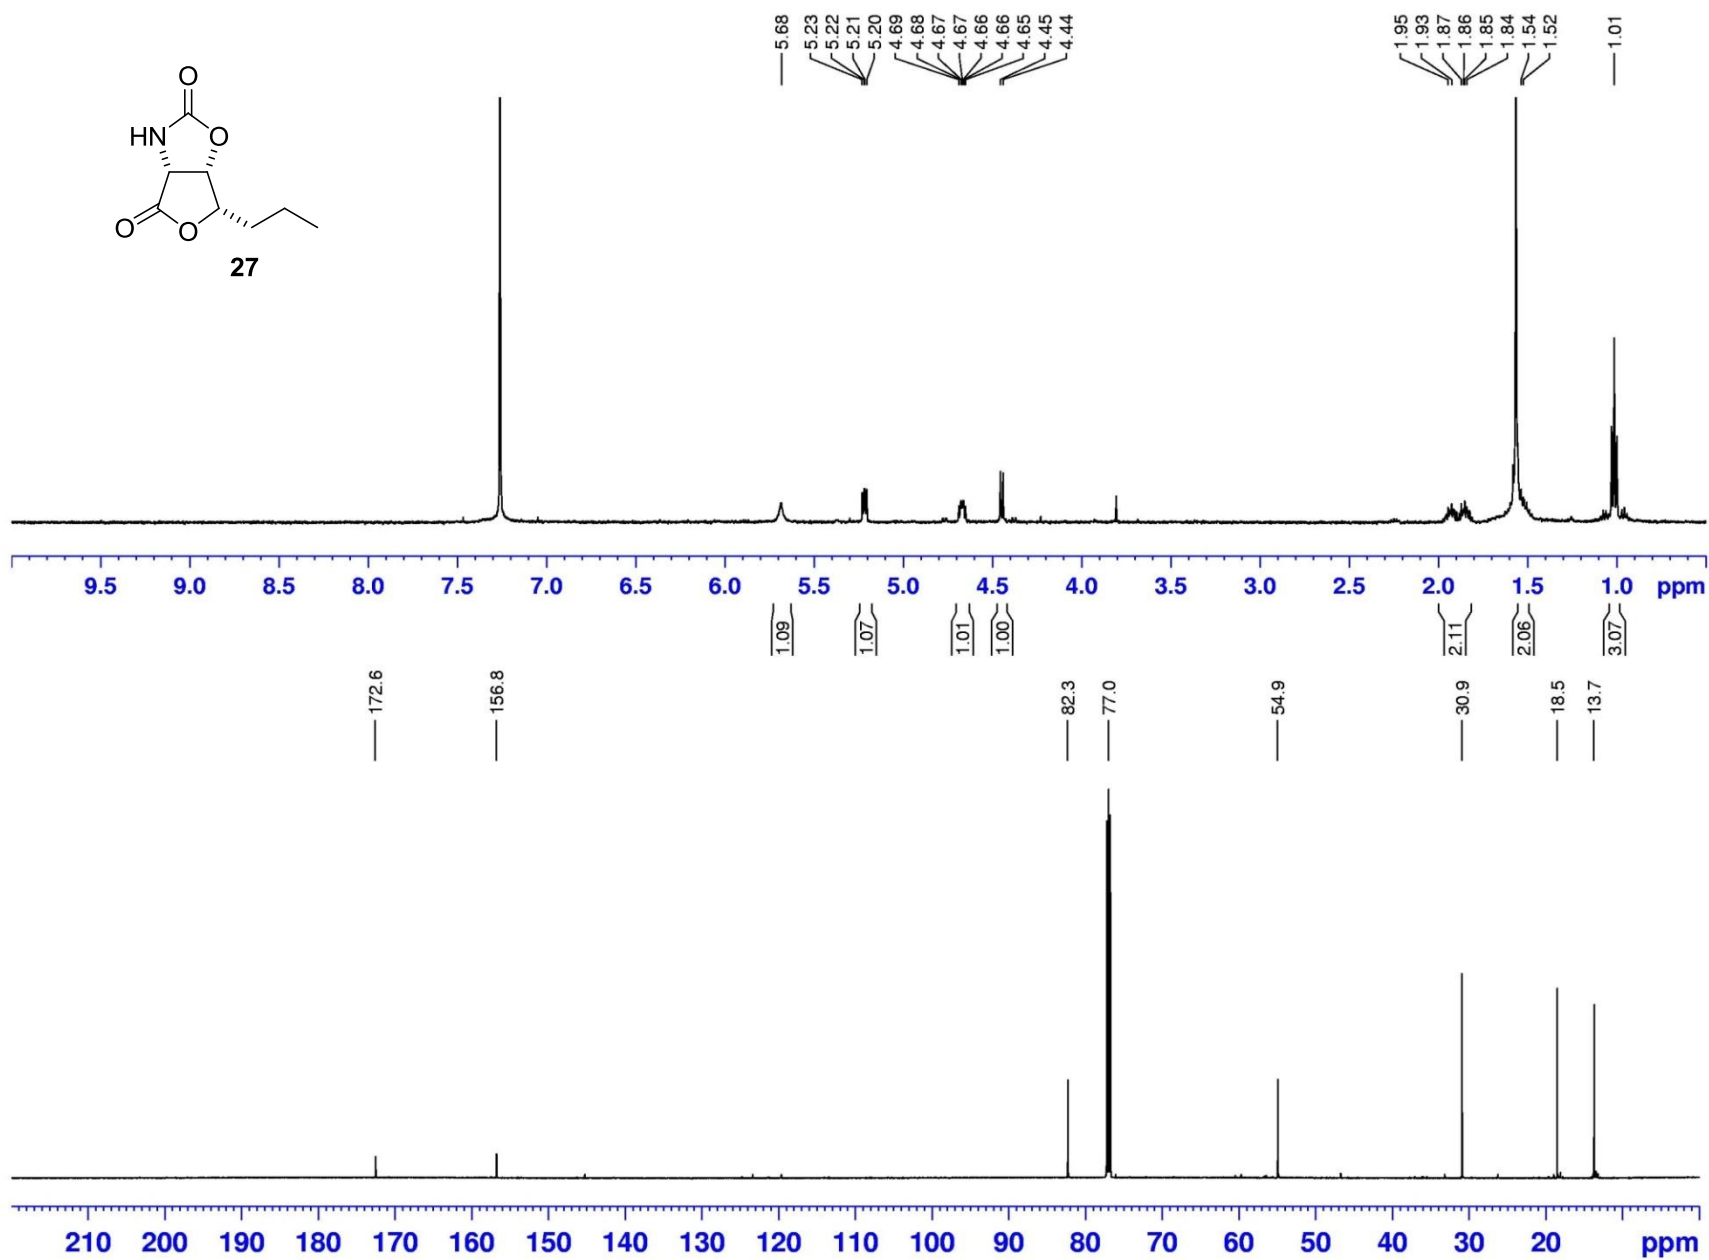



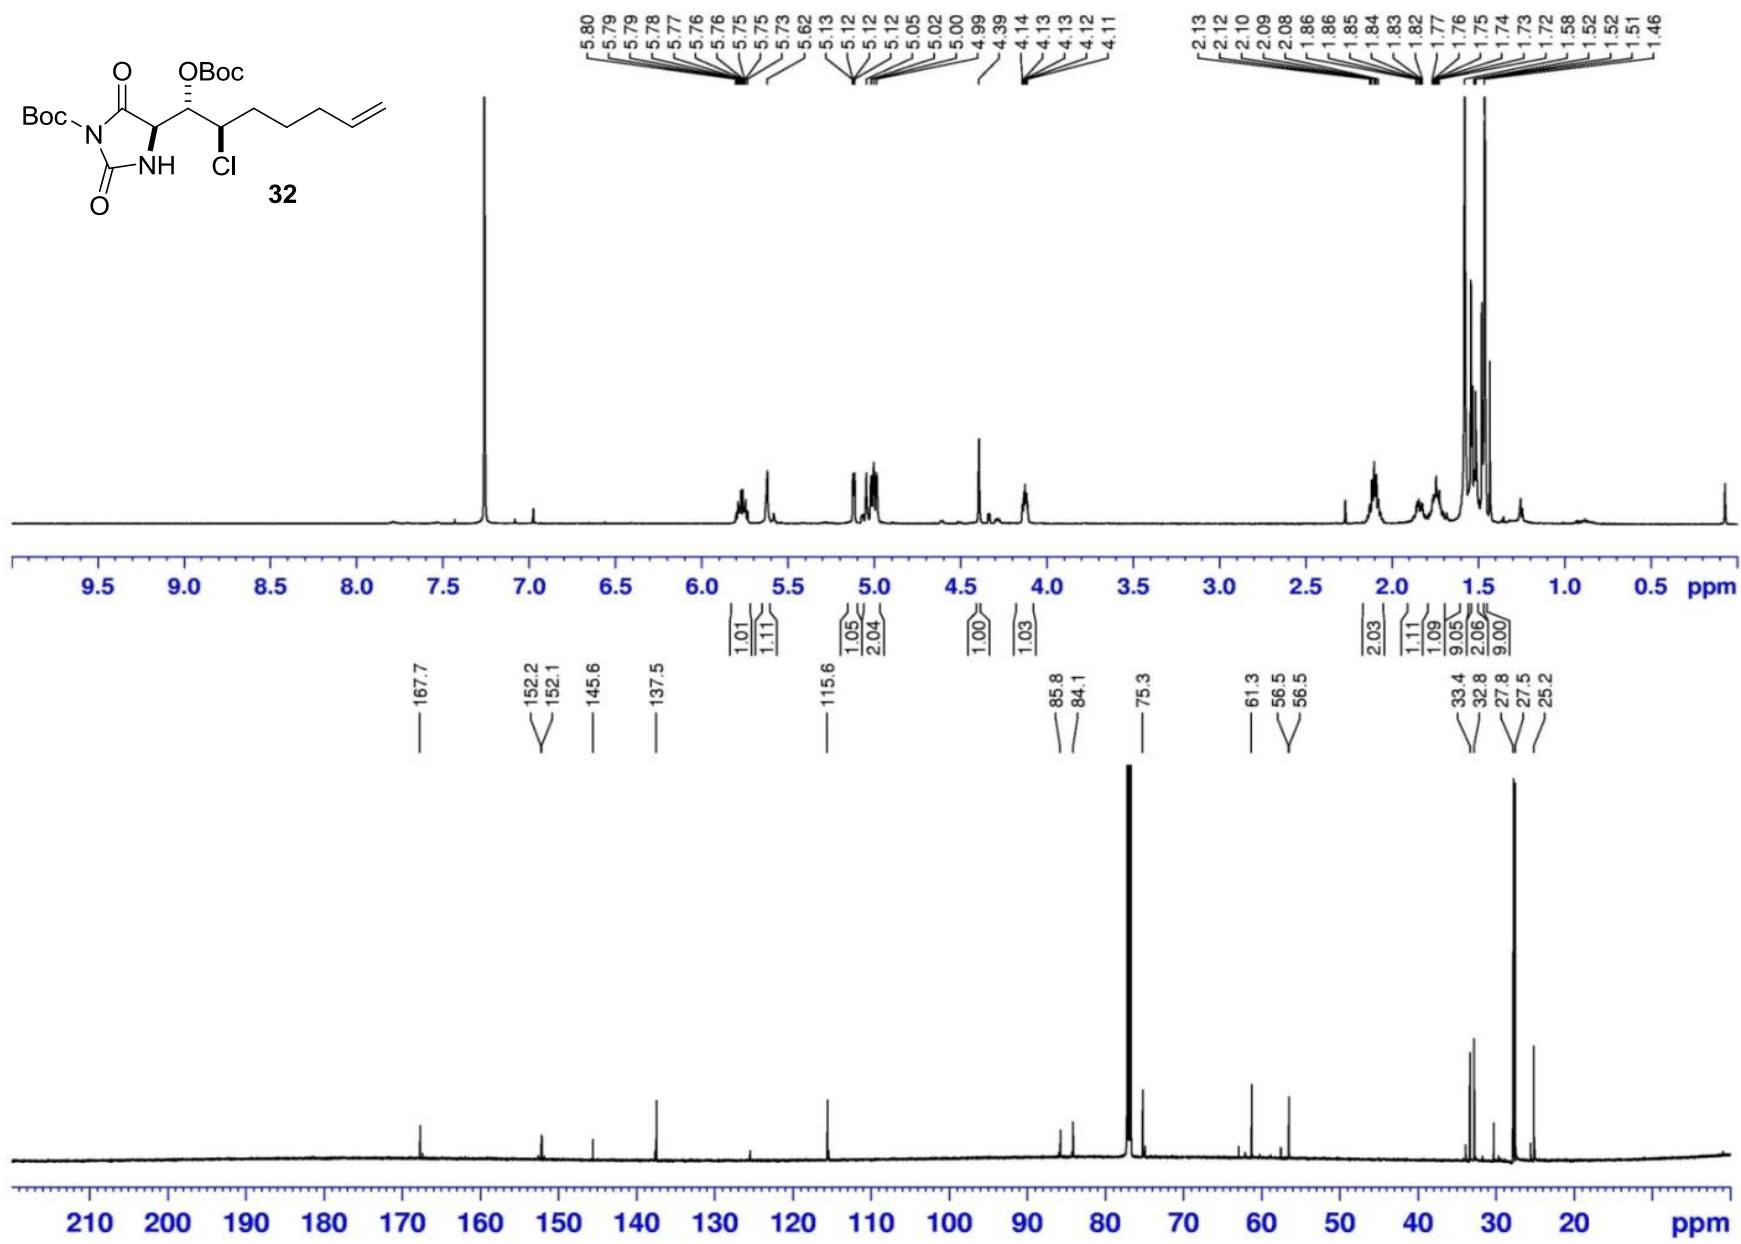

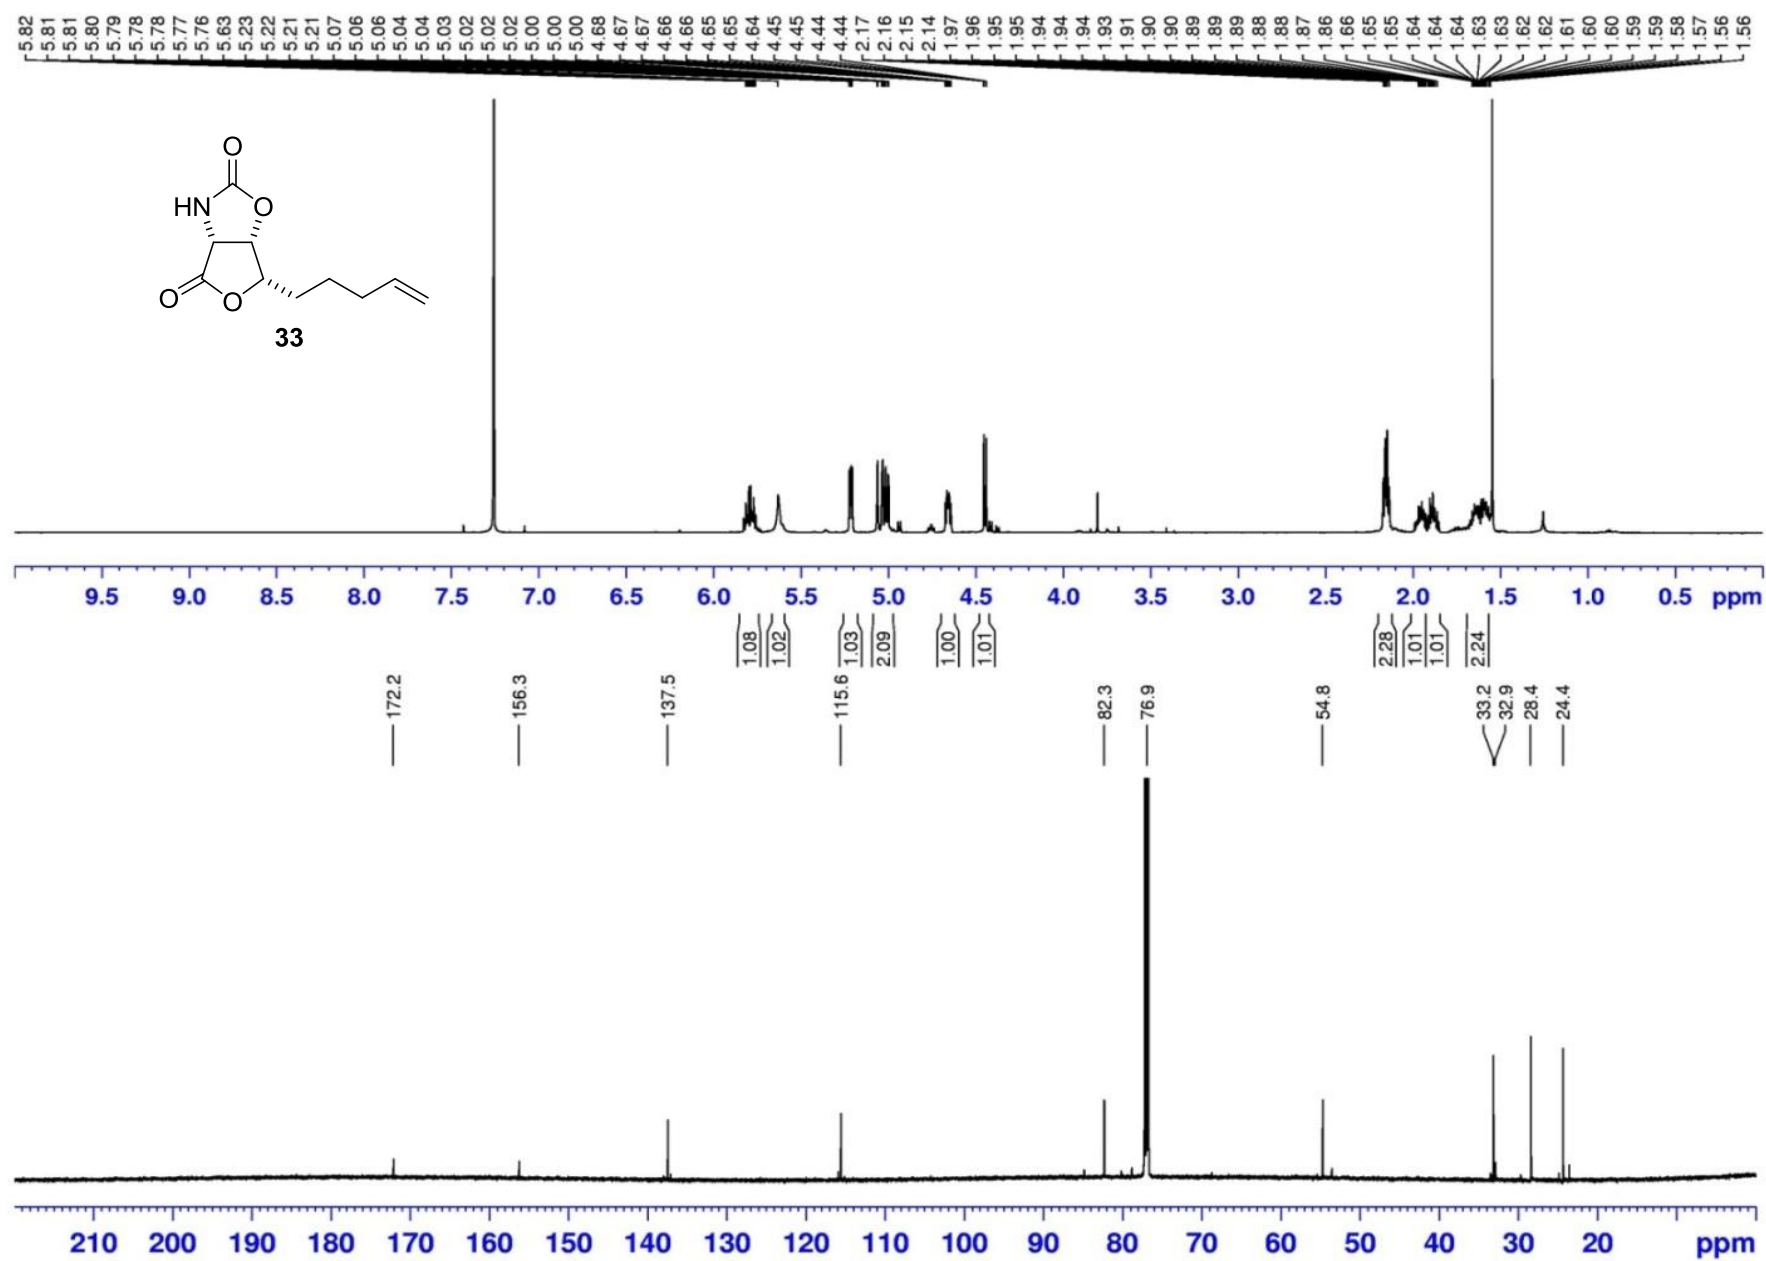

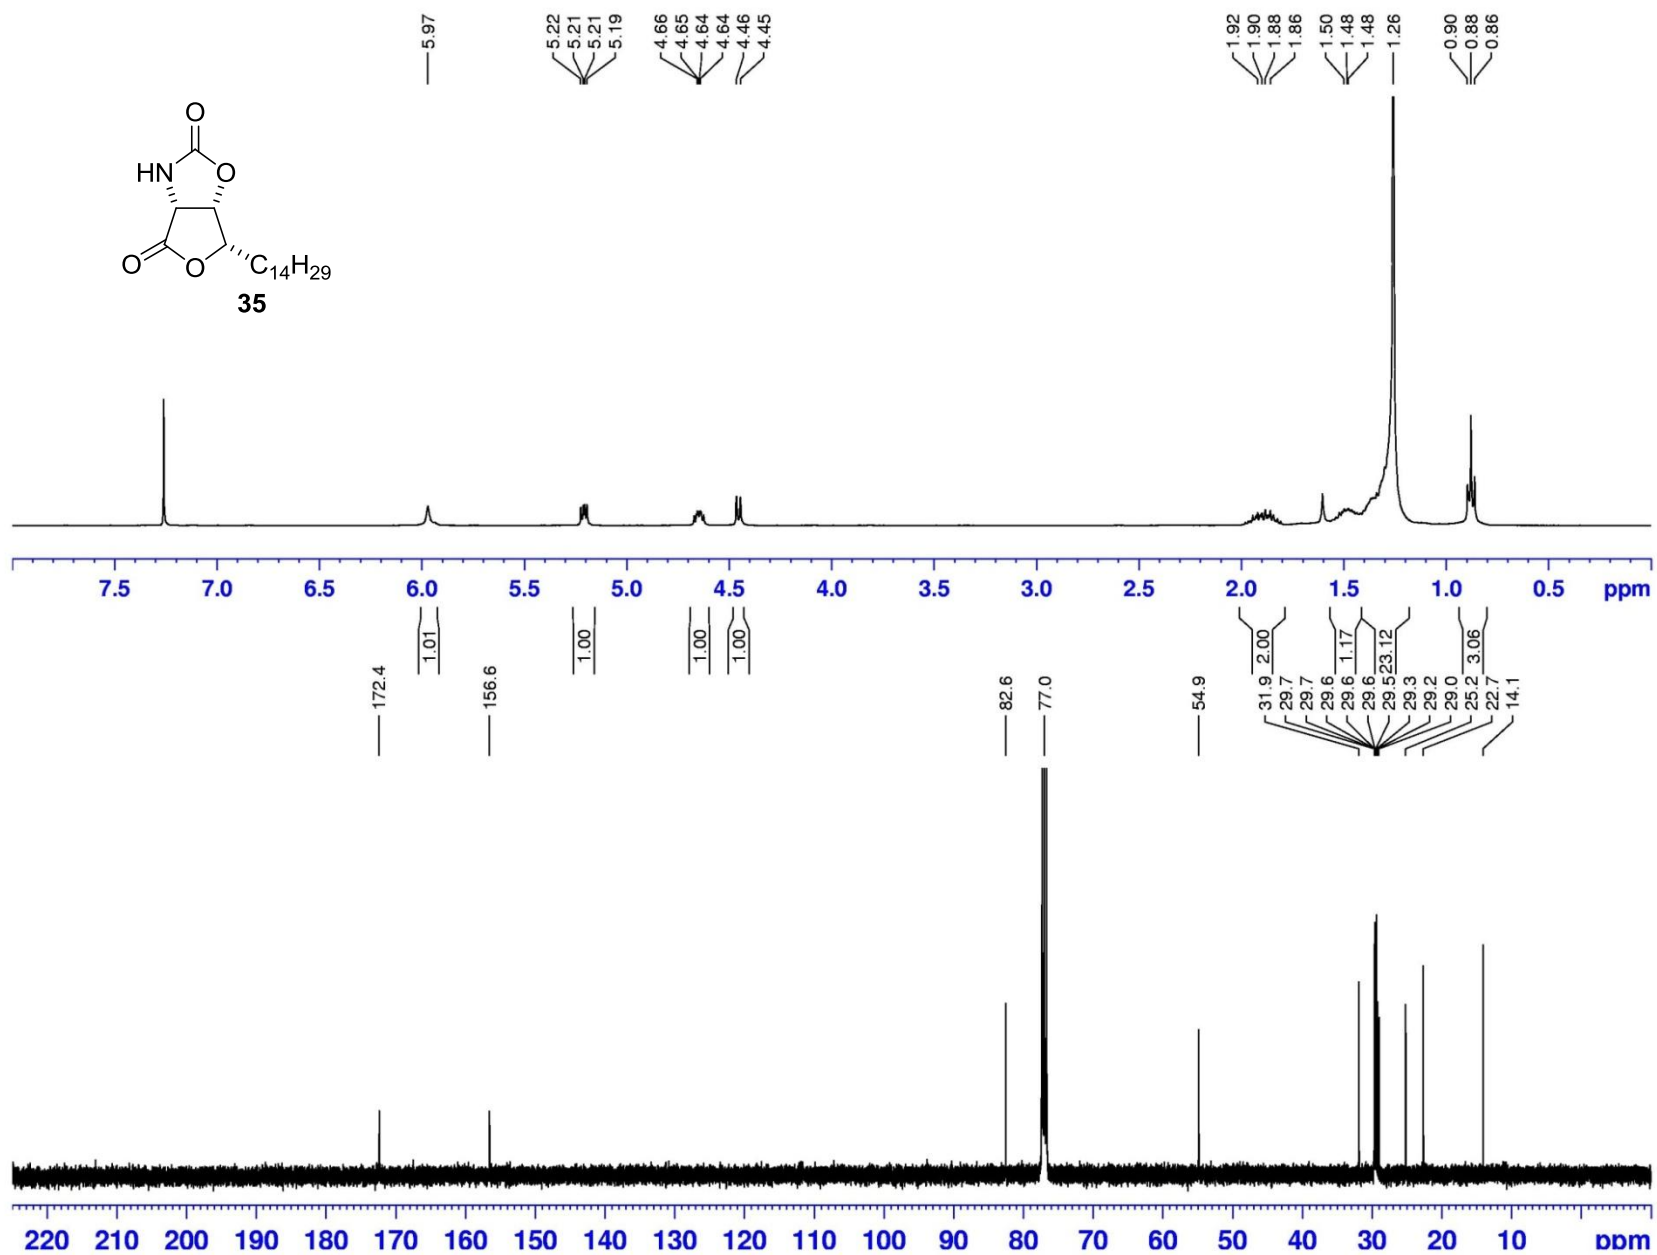



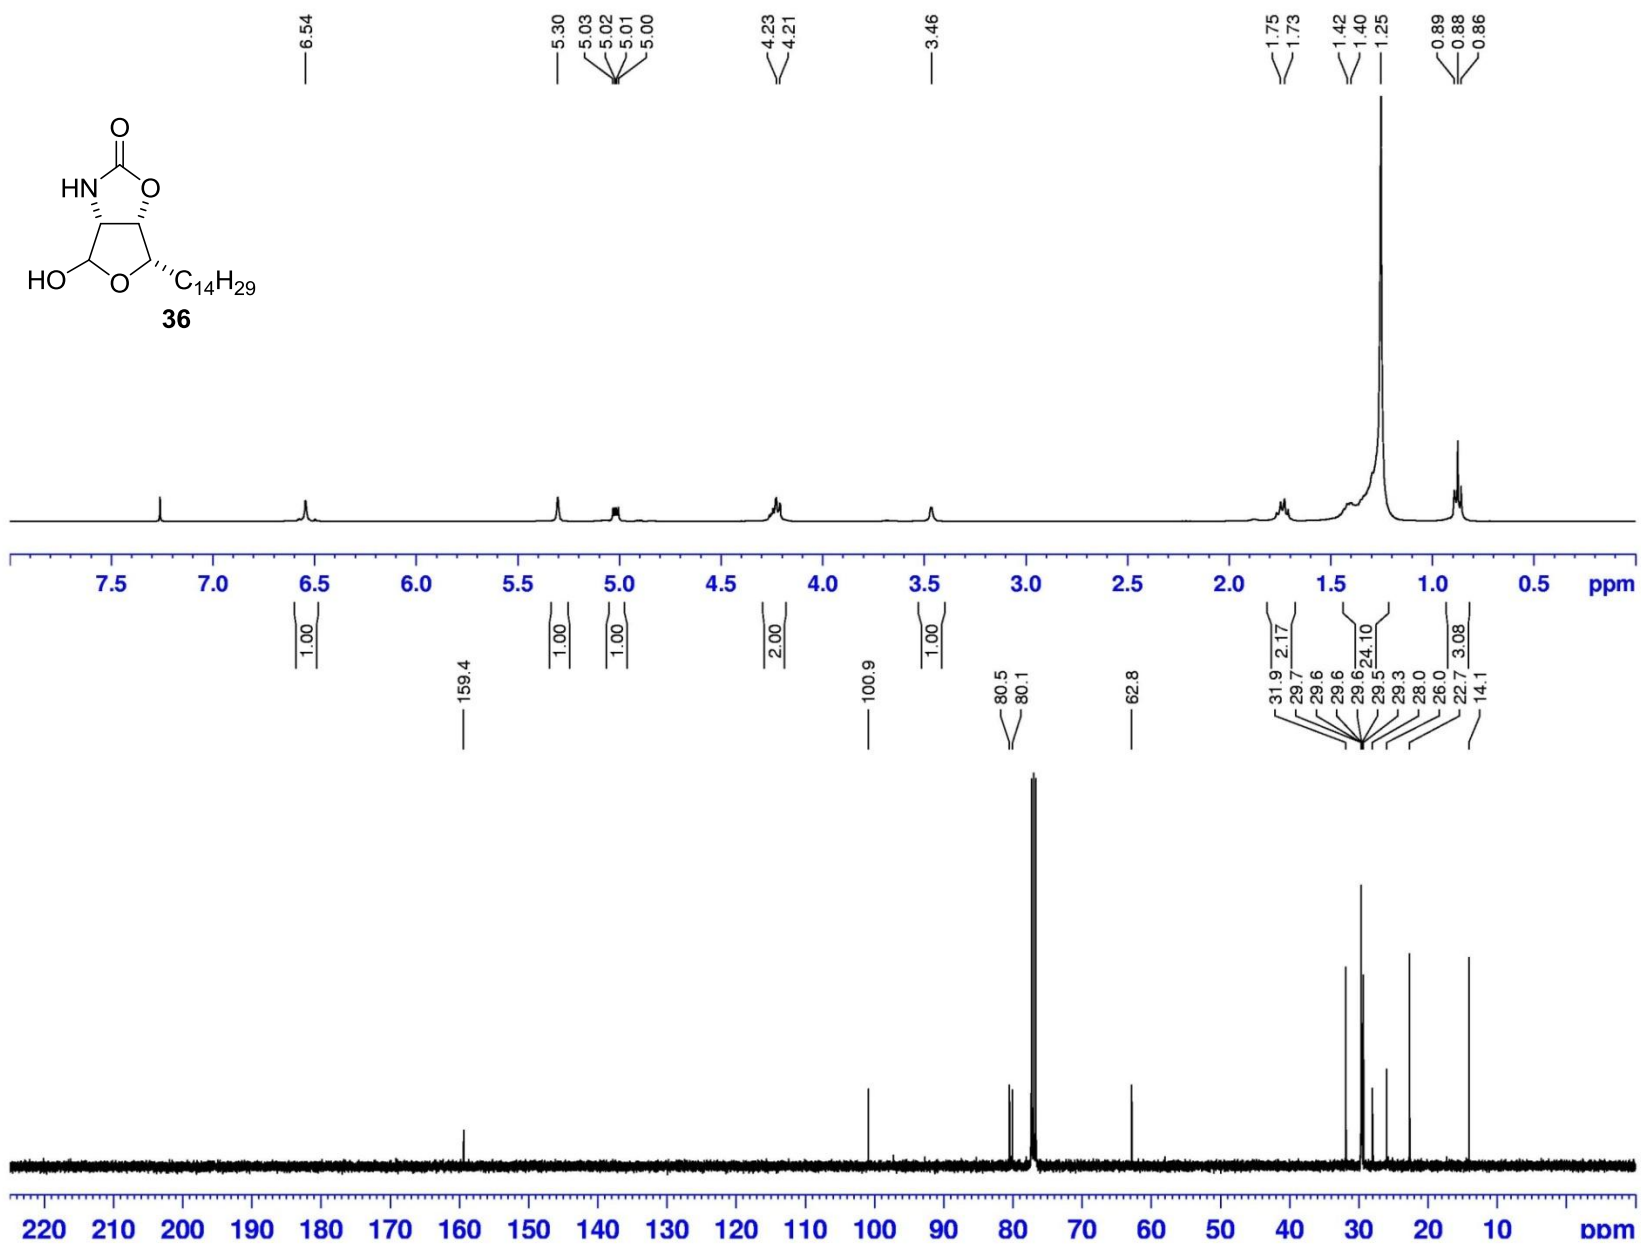

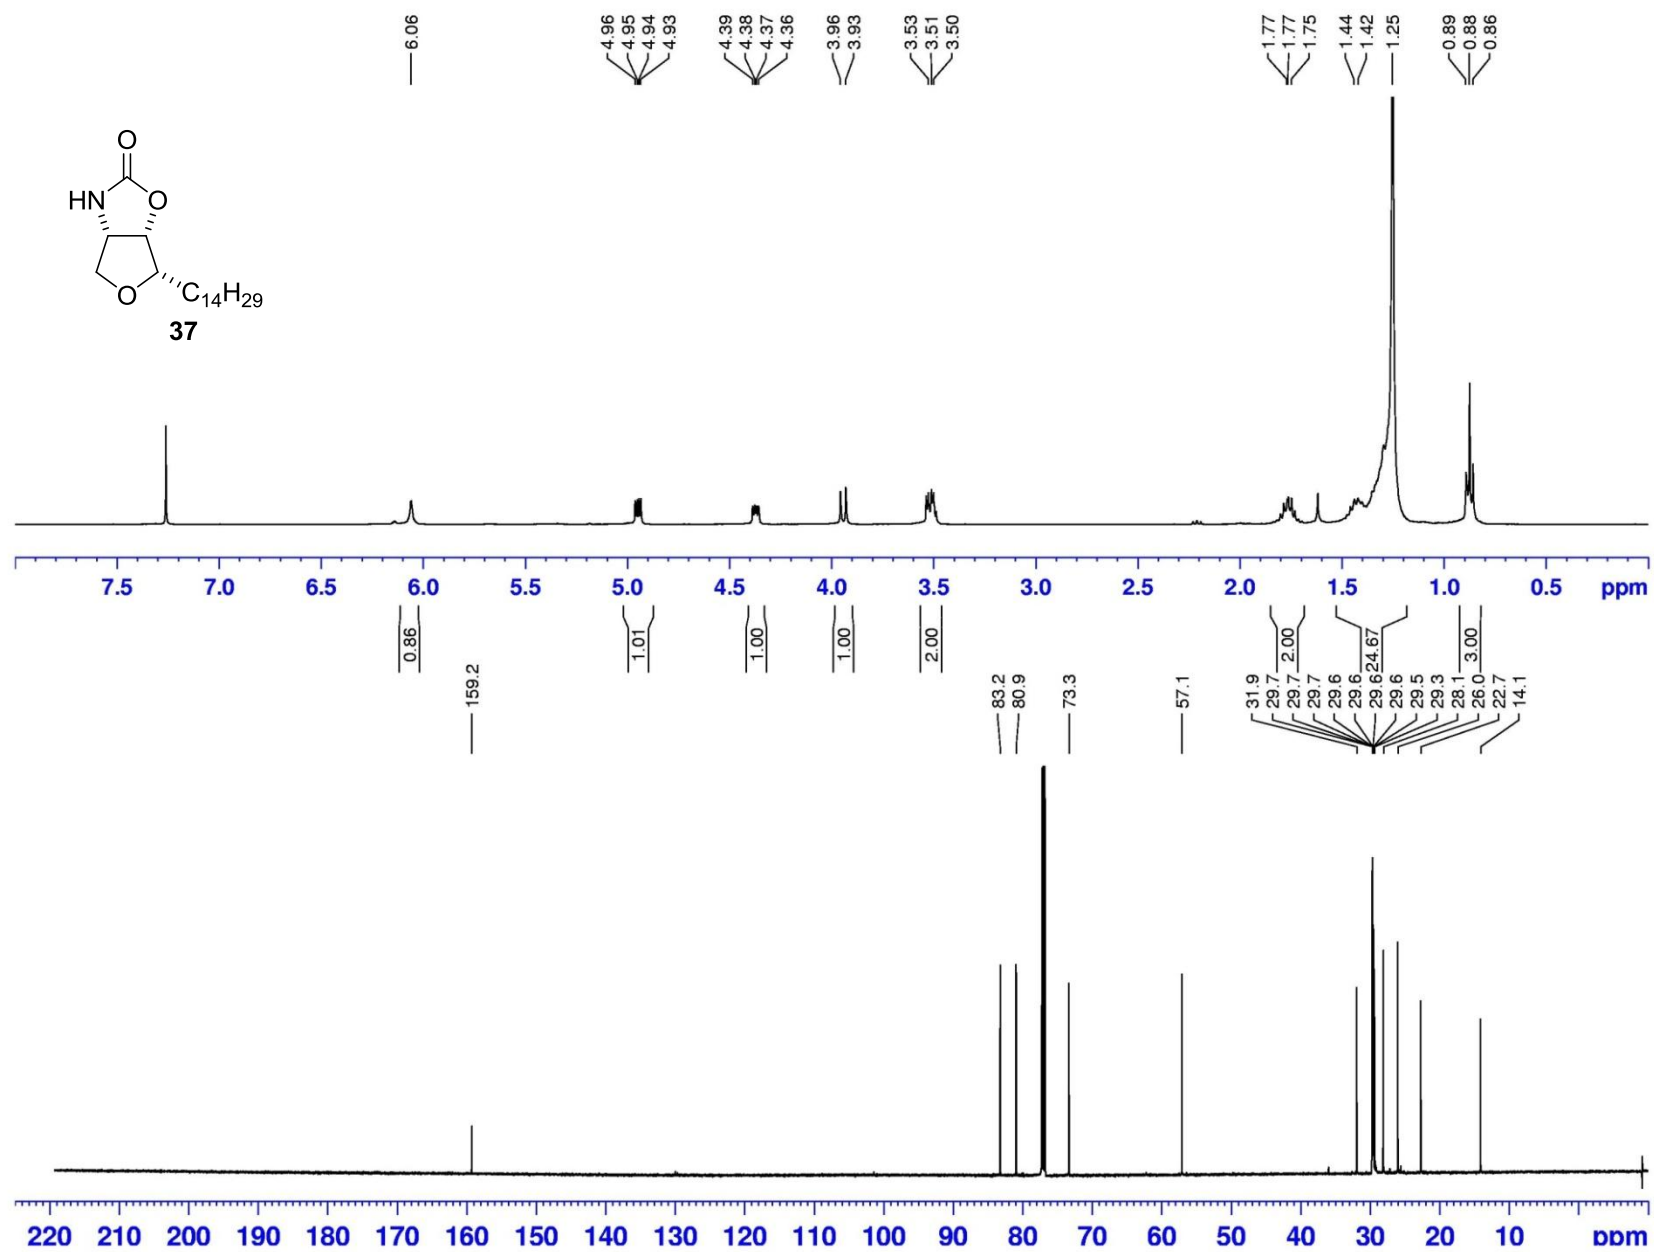

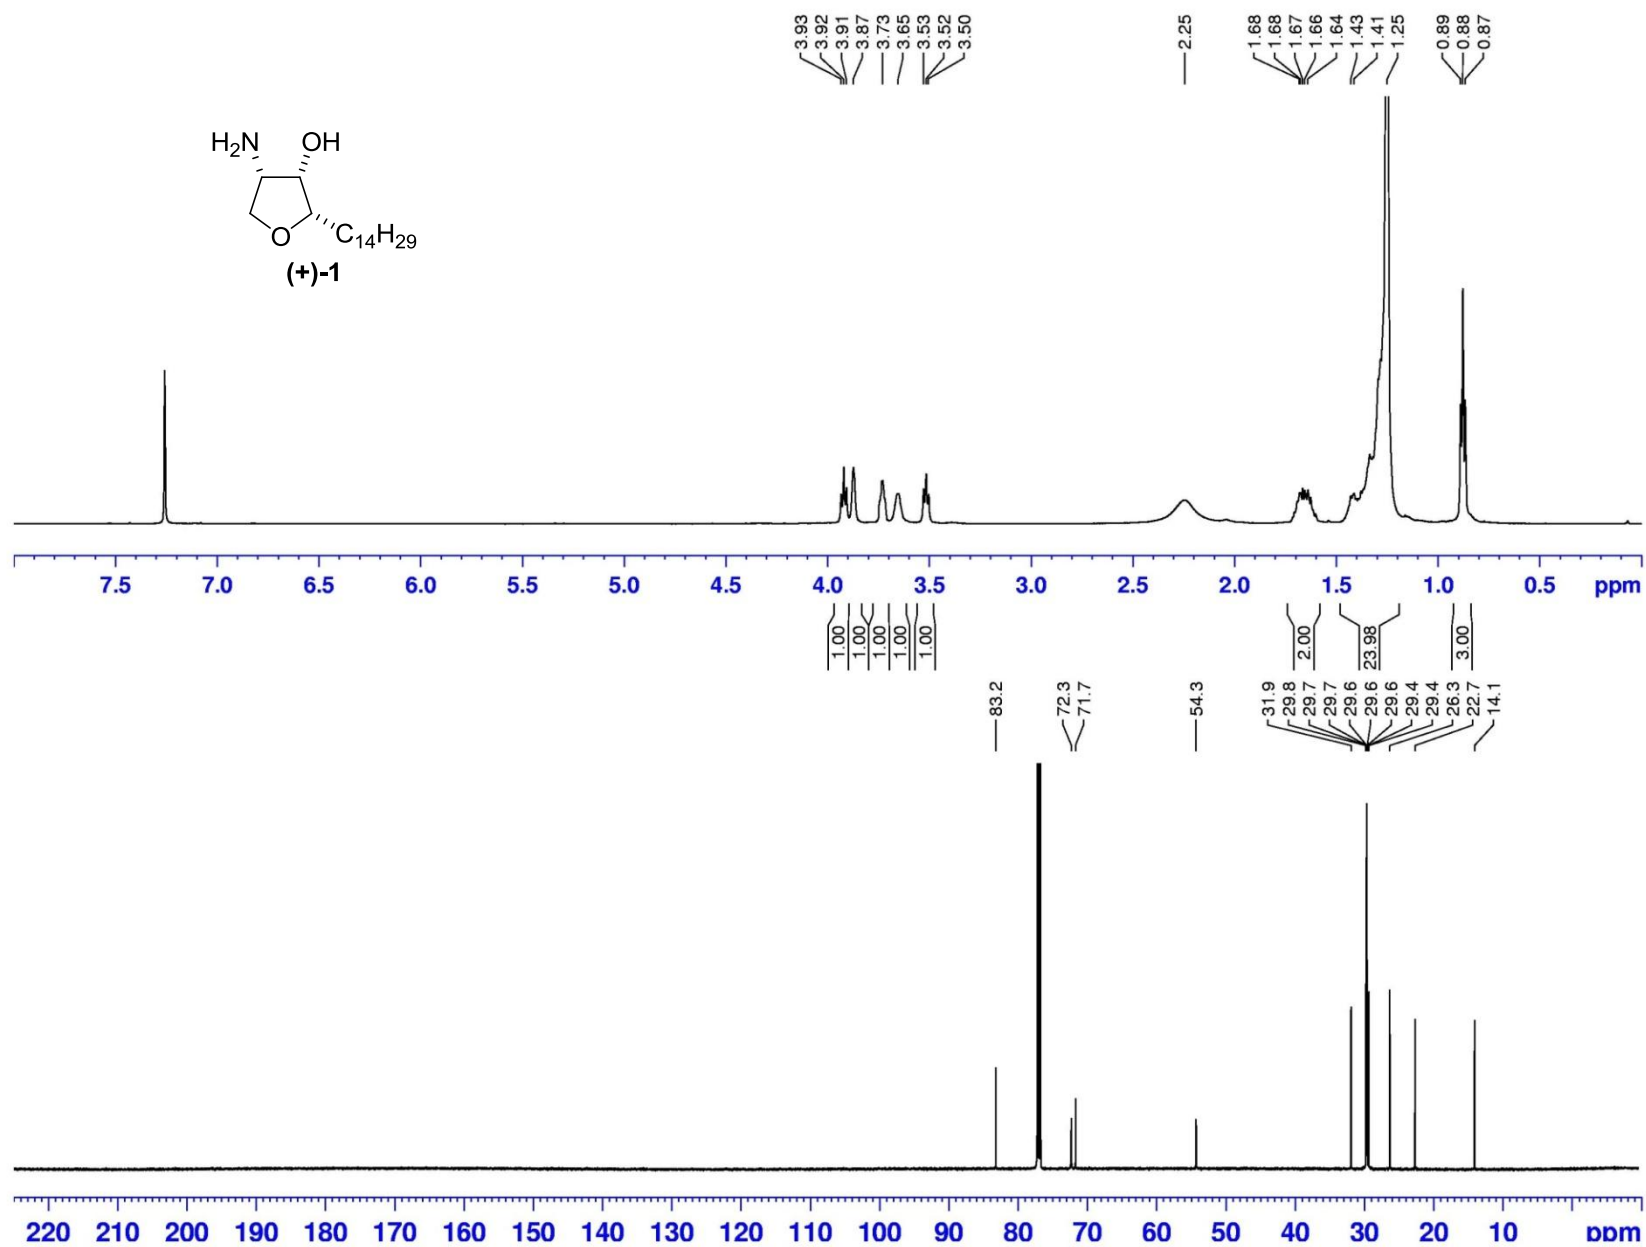

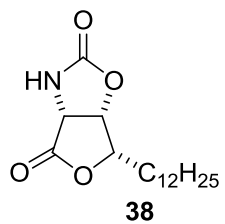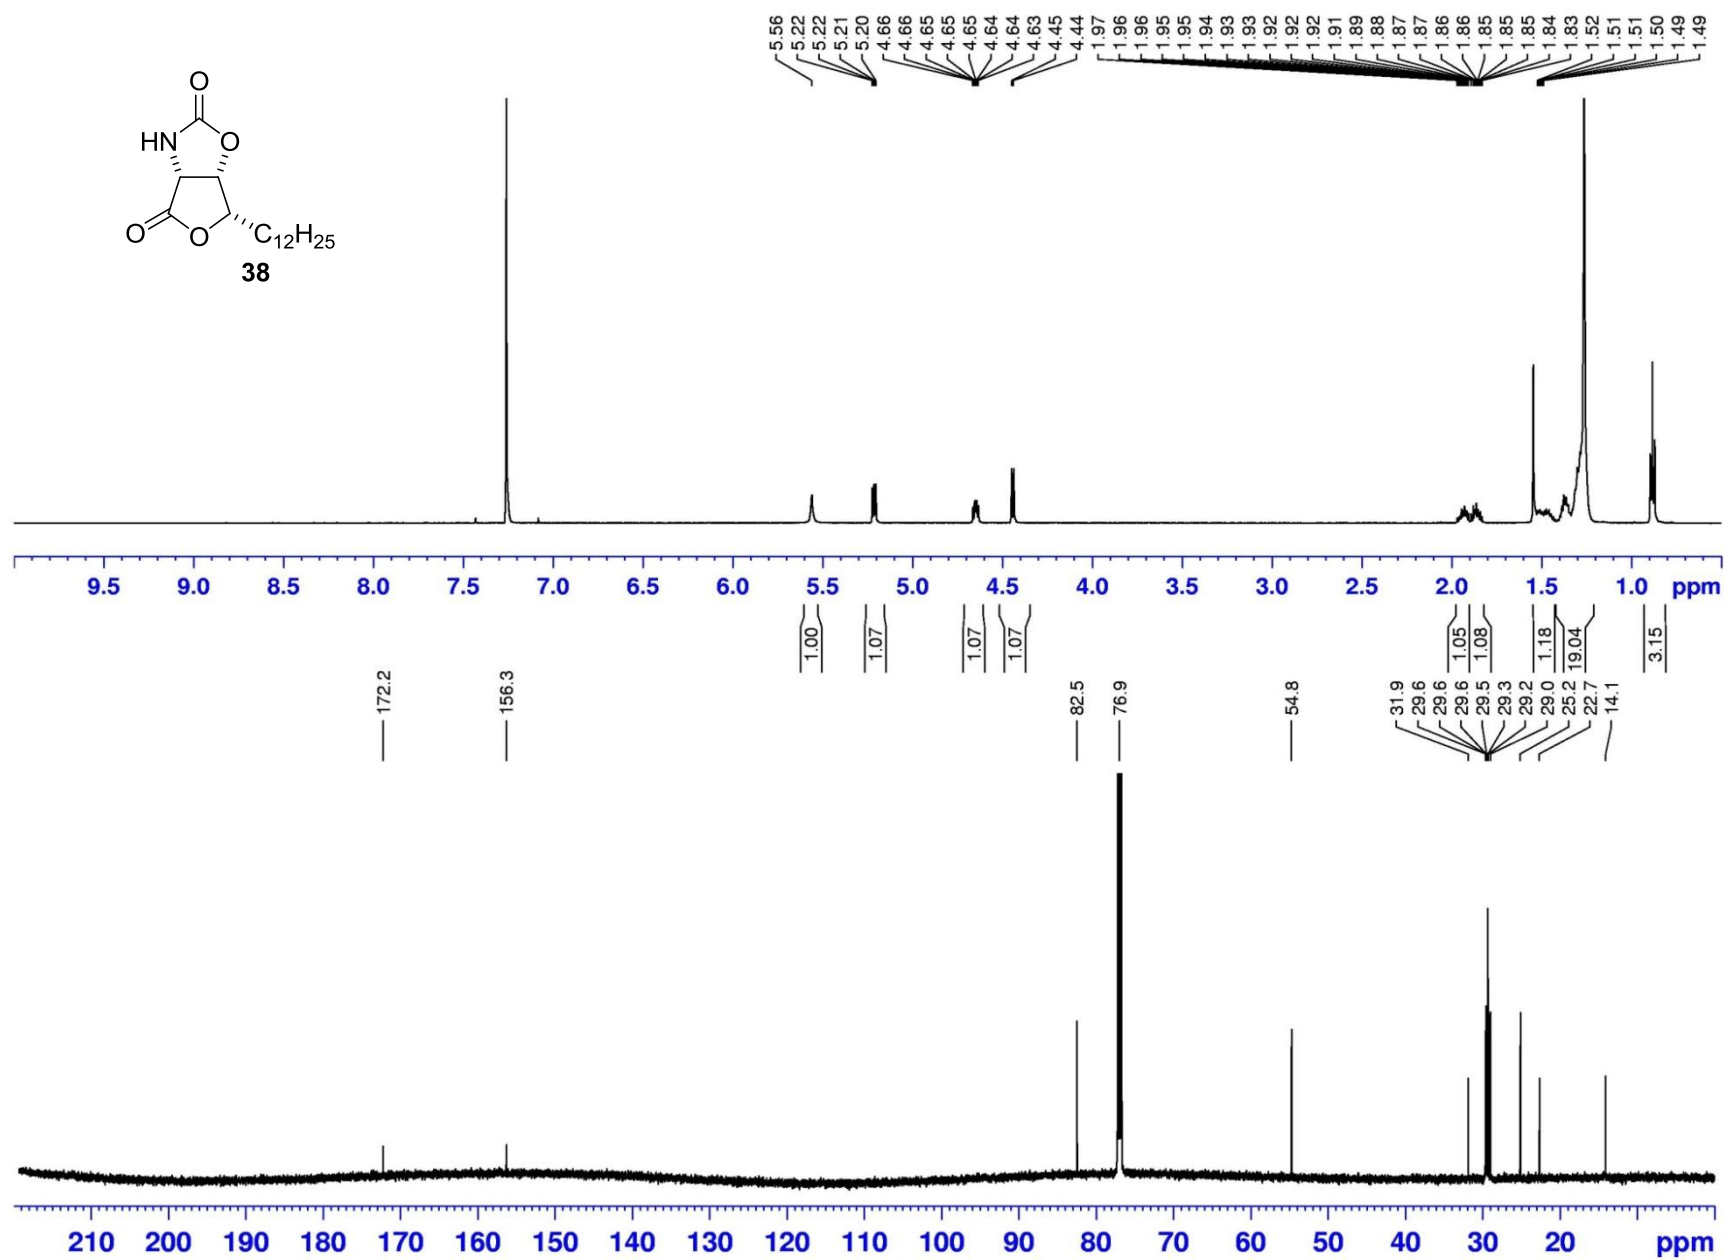

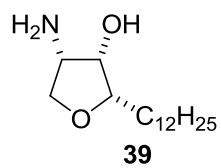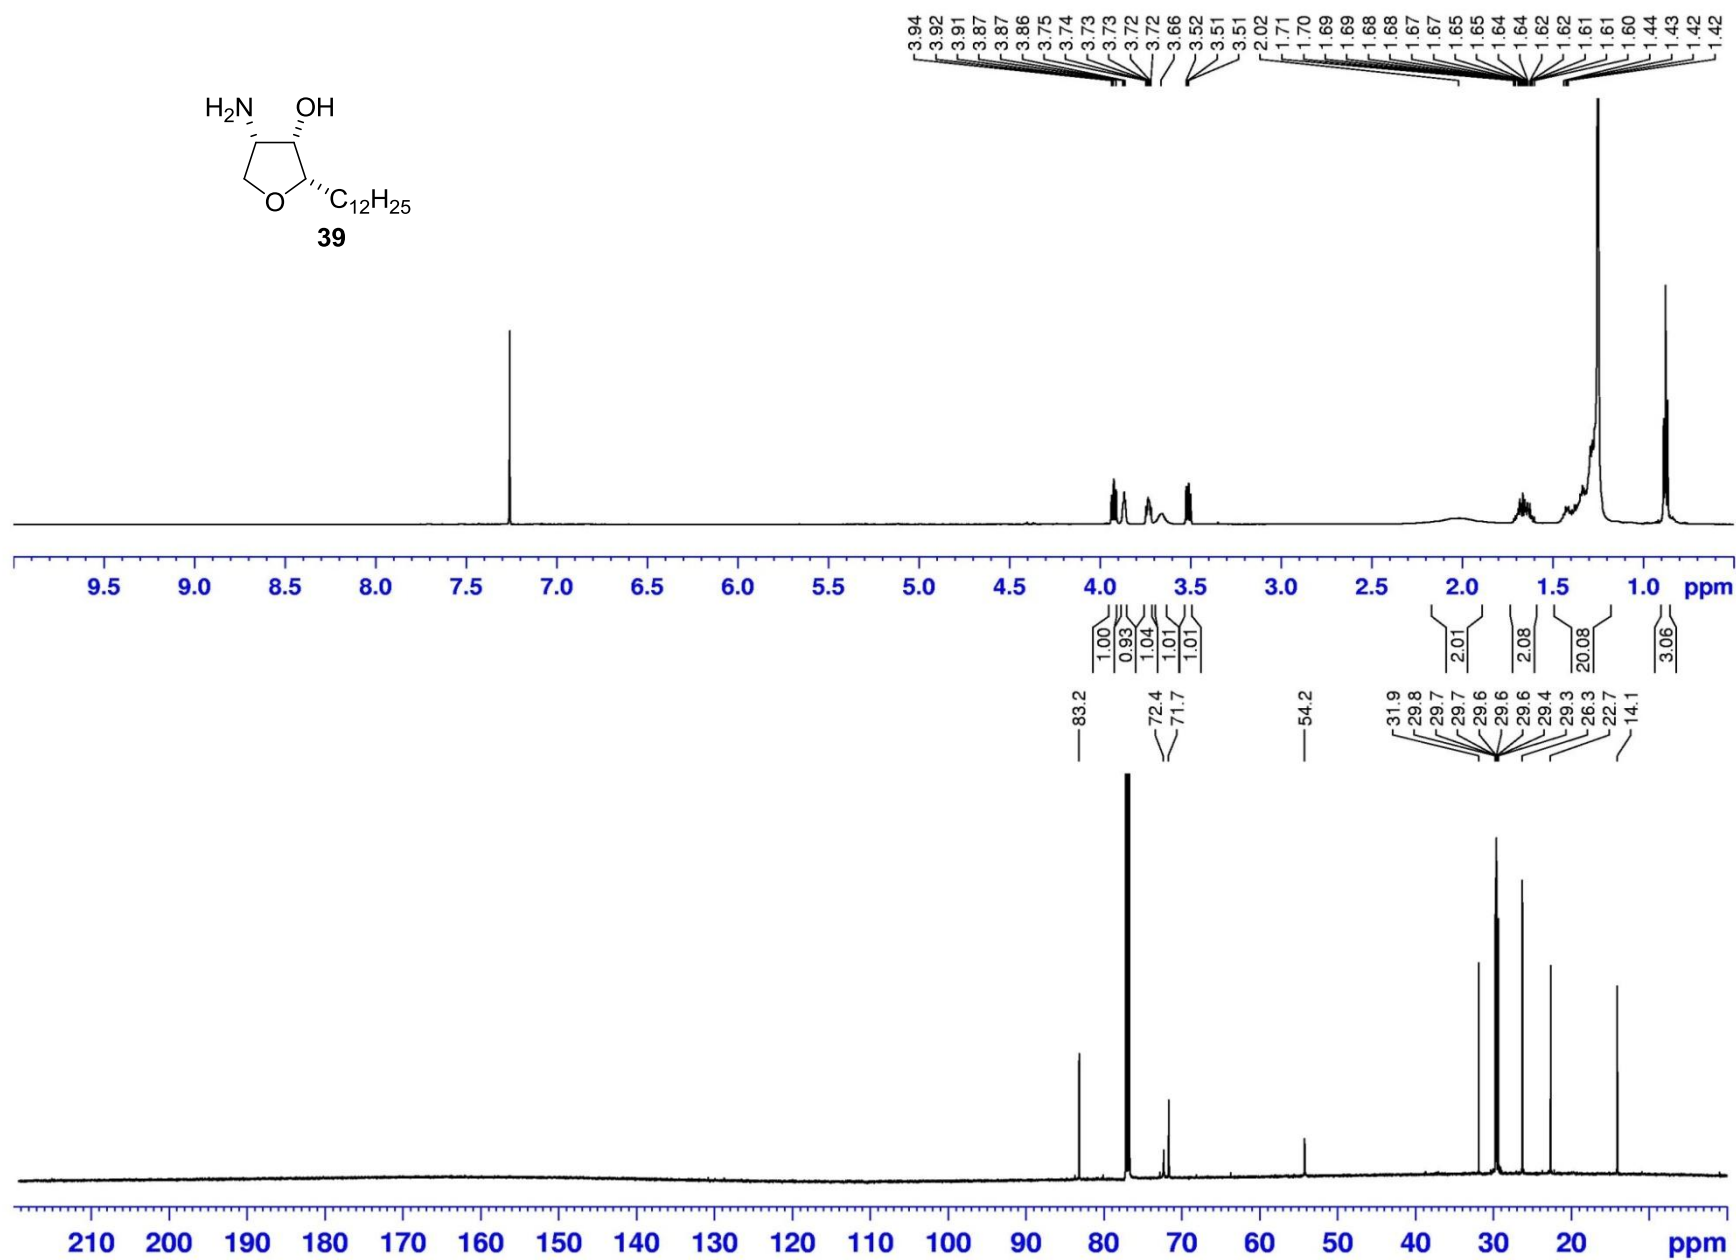

Supplement: Supplementary file 1 [file 4025647]
